# Supplementary material for: Photovoltaic properties of Bi2FeCrO6films epitaxially grown on (100)-oriented silicon substrates
Source: Royal Society of Chemistry journal article supplement (doi:10.1039/c5nr08819d), 2016-01-01
Supplement: c5nr08819d1.pdf [file c5nr08819d1.pdf]

## Supporting Information.

**Table S1.** PLD growth conditions, IP and OP lattice parameters of each layer involved in the heteroepitaxial structure, calculated from the RSM measurements.

| Layer             | $T_s$ (°C) | $pO_2$ (mTorr) | Growth flux (Å/s) | IP $a$ para. (Å) | OP $c$ para. (Å) | $c/a$ ratio |
|-------------------|------------|----------------|-------------------|------------------|------------------|-------------|
| MgO               | 610        | 0.2            | 0.5               | 4.59             | 4.11             | 0.895       |
| NSTO              | 700        | 10             | 0.7               | 4.15             | 4.08             | 0.983       |
| BFCO <sub>s</sub> | 650        | 10             | 0.9               | 3.98             | 3.89             | 0.977       |
| BFCO <sub>r</sub> |            |                |                   | 3.92             | 3.93             | 1.002       |

What do the s and r suffix labels mean?

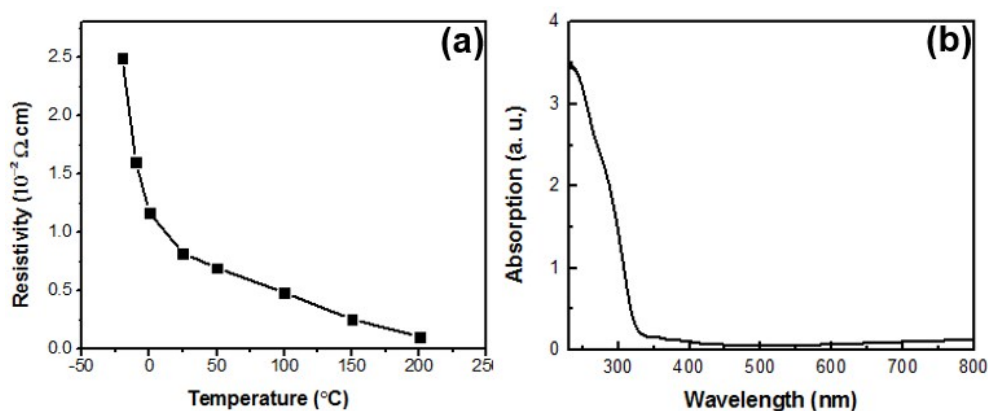

**Figure S1.** (a) Resistivity versus temperature and (b) optical absorption of NSTO films.

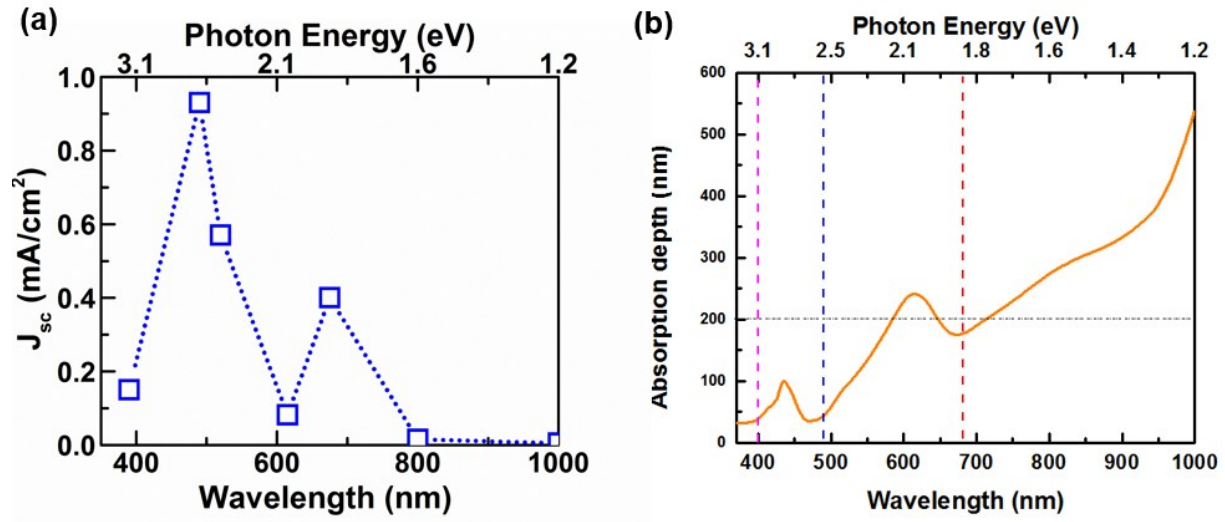

**Figure S2.** (a) Wavelength dependence of the short current density and (b) Absorption depth in 200 nm thick BFCO films.
